# Supplementary material for: Raman and ROA analyses of twisted anthracenes: connecting vibrational and electronic/photonic structures
Source: Royal Society of Chemistry journal article supplement (doi:10.1039/d1cp01505b), 2021-01-01

## **Electronic Supplementary Information**

### **Raman and ROA Analysis of Twisted Anthracenes: Connecting Vibrational and Electronic/Photonic Properties**

#### **Contents**

|                                                       |           |
|-------------------------------------------------------|-----------|
| <b>1. Vibrational assignment</b>                      | <b>2</b>  |
| <b>2. Experimental and theoretical Raman spectra</b>  | <b>3</b>  |
| <b>3. Z-matrix</b>                                    | <b>4</b>  |
| <b>4. Analogue molecule</b>                           | <b>12</b> |
| <b>5. Raman spectra at different excitation laser</b> | <b>14</b> |

## 1. Vibrational assignment

**Table S1.** Wavenumbers and relative intensities measured in the Raman spectra of **Ant-C5** and their correlation with the calculated B3LYP/6-31G\* eigenvalues.

| Experimental |                                             | Calculated<br>(scaled by<br>0.975) | Assignment                                                             |
|--------------|---------------------------------------------|------------------------------------|------------------------------------------------------------------------|
| solid sample | CD <sub>2</sub> Cl <sub>2</sub><br>solution |                                    |                                                                        |
| 1618 w       | 1615 sh                                     | 1617                               | v(bz-tether) + v(bz- central)                                          |
| 1596 m       | 1601 m                                      | 1609                               | v(anthr) + v(bz-tether)                                                |
| 1576 w       |                                             | 1589                               | v(bz-tether)                                                           |
| 1560 s       | 1562 s                                      | 1566                               | v(anthr)                                                               |
| 1533 sh      |                                             | 1540                               | v(anthr)                                                               |
| 1529 m       | 1534 m                                      | 1527                               | v(anthr)                                                               |
| 1490 vw      | 1490 vw                                     | 1485                               | $\delta(\text{CH}_2) + \delta(\text{CH}),\text{bz-tether}$             |
| 1481 vw      | 1482 vw                                     | 1477                               | $\delta(\text{CH}),\text{anthr} + \delta(\text{CH}),\text{bz-central}$ |
| 1443 vw      | 1445 vw                                     | 1439                               | $\delta(\text{CH}),\text{bz-central}$                                  |
| 1408 s       | 1410 m                                      | 1407                               | $\delta(\text{CH}),\text{anthr}$                                       |
| 1373 s       | 1374 m                                      | 1356                               | $\delta(\text{CH}_2) + \nu(\text{bz-central}) + \nu(\text{C-CF}_3)$    |
| 1345 m       | 1348 m                                      | 1343                               | $\delta(\text{CH}),\text{anthr}$                                       |
| 1277 m       | 1276 sh                                     | 1270                               | $\omega(\text{CH}_2) + \delta(\text{CH}),\text{all}$                   |
| 1260 s       | 1268 s                                      | 1256                               | $\delta(\text{CH}),\text{anthr}$                                       |
| 1191 w       | 1196 vw                                     | 1185                               | $\delta(\text{CH}),\text{anthr}$                                       |
| 1163 vw      | 1196 vw                                     | 1185                               | $\delta(\text{CH}),\text{anthr}$                                       |
| 1043 m       | 1047 sh                                     | 1042                               | $\delta(\text{CH}),\text{anthr} + \delta(\text{CH}),\text{bz-tether}$  |
| 1003 m       | 1007 w                                      | 992                                | v(bz- central),breathing                                               |
| 972 w        | 980 vw                                      | 958                                | $\gamma(\text{CH}),\text{anhr}$                                        |

## 2. Experimental and theoretical Raman spectra

**Figure S1.** Experimental (532 nm excitation laser) Raman spectra of the twistacene series.

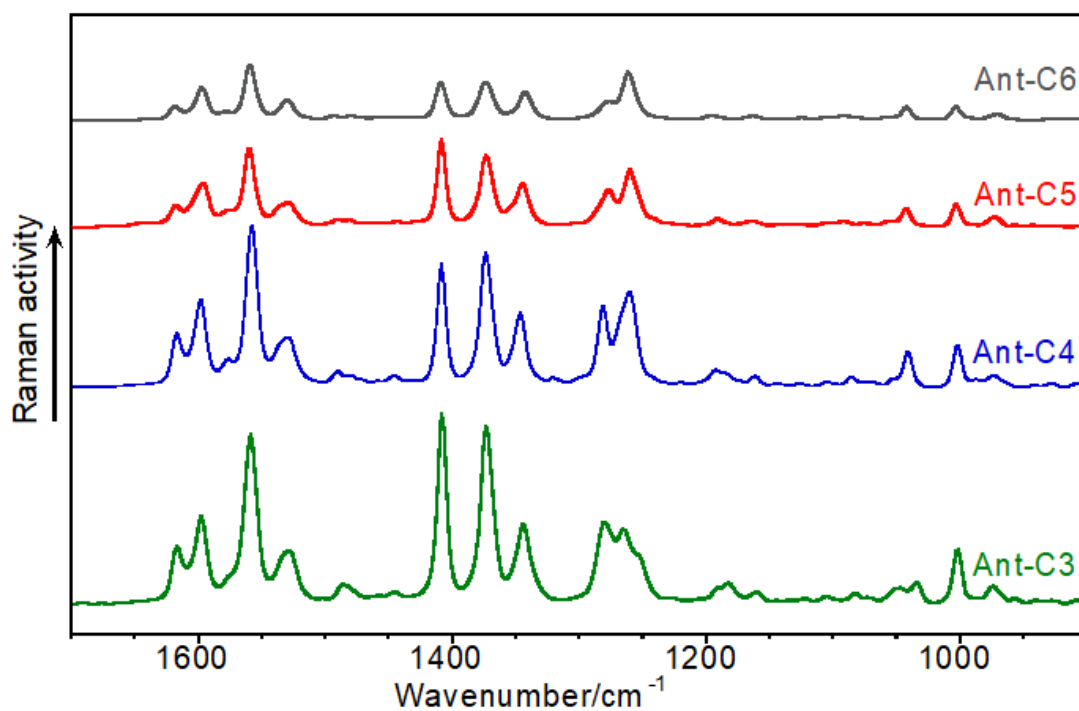

**Figure S2.** Calculated (B3LYP/6-31G\*) Raman spectra of the twistacene series.

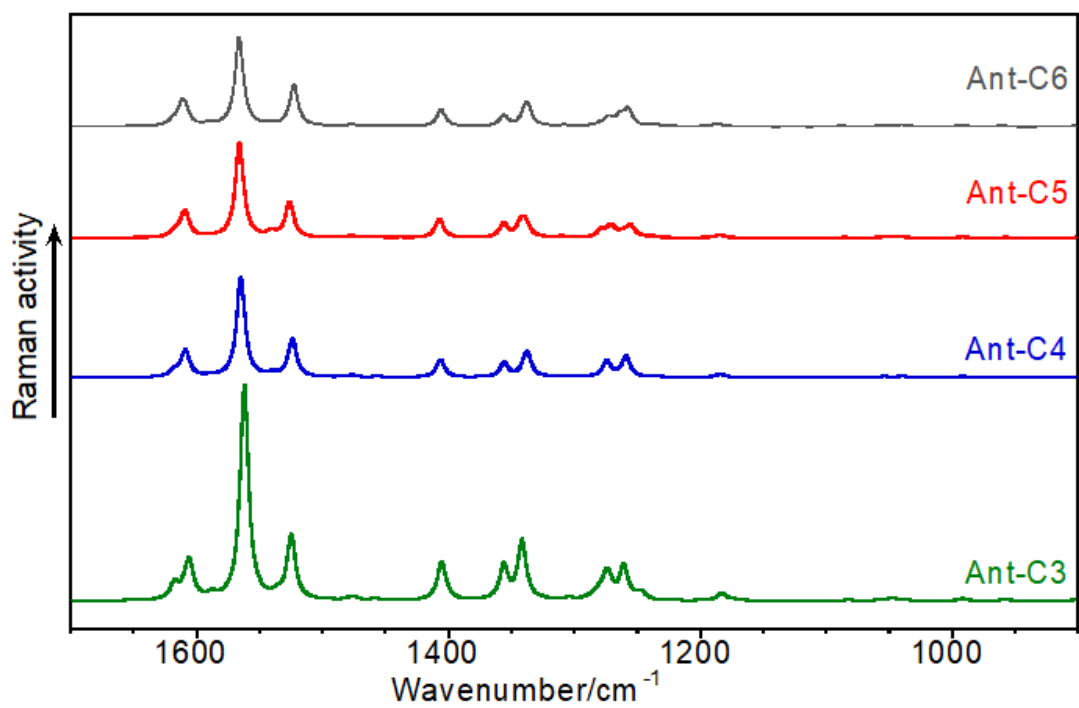

### 3. Z-matrix.

**Table S2.** Cartesian coordinates of the optimized structures of (*M*) and (*P*) enantiomers of the twistacene series.

| <b>(<i>M</i>)-Ant-C3</b> |          |          |          |   |          |          |          |
|--------------------------|----------|----------|----------|---|----------|----------|----------|
|                          |          |          |          | H | 4.06574  | -3.47483 | 2.01524  |
|                          |          |          |          | H | 6.07347  | 0.00697  | 3.52067  |
|                          |          |          |          | H | 6.06048  | -2.42996 | 2.98954  |
| C                        | 1.10097  | 0.99026  | 3.36414  | C | -2.92397 | -1.34279 | -1.89741 |
| C                        | 1.62362  | 0.50541  | 2.18427  | C | -2.68334 | -2.56552 | -1.23072 |
| C                        | 0.82445  | 0.59524  | 0.9763   | C | -4.2412  | -1.0234  | -2.24542 |
| C                        | -0.59321 | 0.82677  | 1.12869  | C | -3.74446 | -3.38775 | -0.84684 |
| C                        | -1.0651  | 1.35879  | 2.37193  | C | -5.30195 | -1.85162 | -1.8751  |
| C                        | -0.22284 | 1.49386  | 3.44144  | H | -4.44022 | -0.09607 | -2.77344 |
| C                        | 1.34454  | 0.48998  | -0.33492 | C | -5.05467 | -3.02155 | -1.15591 |
| C                        | -1.46769 | 0.51591  | 0.05943  | H | -3.535   | -4.32728 | -0.34463 |
| C                        | -0.94047 | 0.10011  | -1.18504 | H | -6.31841 | -1.57786 | -2.14045 |
| C                        | 0.46761  | 0.30448  | -1.43066 | H | -5.87743 | -3.66436 | -0.85749 |
| C                        | 0.91477  | 0.30303  | -2.79327 | O | 1.78421  | -2.13298 | 1.363    |
| H                        | 1.94059  | 0.57526  | -3.01038 | O | -1.37686 | -2.98355 | -1.10671 |
| C                        | 0.06711  | -0.03676 | -3.81257 | C | 1.65213  | -3.5176  | 1.03557  |
| C                        | -1.23662 | -0.52462 | -3.52178 | H | 2.60678  | -3.92828 | 0.6897   |
| C                        | -1.73149 | -0.50807 | -2.24073 | H | 1.34811  | -4.07748 | 1.93153  |
| H                        | 1.69488  | 0.91534  | 4.26991  | C | -0.77101 | -3.13923 | 0.18404  |
| H                        | -2.10467 | 1.64902  | 2.46039  | H | -0.7423  | -2.17477 | 0.70214  |
| H                        | -0.58728 | 1.90703  | 4.37699  | H | -1.33651 | -3.85105 | 0.8017   |
| H                        | 0.41679  | -0.01985 | -4.84035 | C | 0.644    | -3.6433  | -0.10227 |
| H                        | -1.82092 | -0.99181 | -4.30897 | H | 1.02024  | -3.06873 | -0.9547  |
| C                        | -2.93488 | 0.73508  | 0.23464  | H | 0.60435  | -4.69198 | -0.41886 |
| C                        | -3.57934 | 1.72821  | -0.51349 | C | -5.83217 | -0.56898 | 2.31677  |
| C                        | -3.69136 | -0.00372 | 1.15352  | C | -5.62329 | 2.95157  | -1.26934 |
| C                        | -4.94786 | 1.95599  | -0.3657  | C | 5.73938  | -1.35987 | -1.91483 |
| H                        | -3.00831 | 2.31873  | -1.22176 | C | 5.48869  | 3.25374  | 0.07817  |
| C                        | -5.05861 | 0.23069  | 1.30164  | F | 5.88247  | -2.3498  | -1.00298 |
| H                        | -3.21487 | -0.78378 | 1.73655  | F | 5.12615  | -1.9087  | -2.98861 |
| C                        | -5.69765 | 1.20999  | 0.54218  | F | 6.97794  | -0.9873  | -2.29919 |
| H                        | -6.76073 | 1.38307  | 0.6508   | F | 6.69128  | 3.45129  | -0.50112 |
| C                        | 2.80873  | 0.64466  | -0.57551 | F | 5.69458  | 3.21152  | 1.41772  |
| C                        | 3.45134  | 1.83667  | -0.21491 | F | 4.73259  | 4.34677  | -0.16397 |
| C                        | 3.57363  | -0.37196 | -1.16073 | F | -7.16345 | -0.50889 | 2.10233  |
| C                        | 4.82277  | 1.99499  | -0.40917 | F | -5.61033 | -0.11936 | 3.57428  |
| H                        | 2.87379  | 2.64065  | 0.22803  | F | -5.47402 | -1.87209 | 2.30013  |
| C                        | 4.94628  | -0.20954 | -1.35385 | F | -5.84519 | 2.4195   | -2.49829 |
| H                        | 3.09593  | -1.30128 | -1.45018 | F | -6.81987 | 3.34824  | -0.78885 |
| C                        | 5.58186  | 0.97215  | -0.97696 | F | -4.86854 | 4.05565  | -1.45533 |
| H                        | 6.64674  | 1.09522  | -1.1273  |   |          |          |          |
| C                        | 2.90076  | -0.26223 | 2.27466  |   |          |          |          |
| C                        | 2.92129  | -1.64266 | 1.94754  |   |          |          |          |
| C                        | 4.04898  | 0.30011  | 2.84225  |   |          |          |          |
| C                        | 4.05483  | -2.41235 | 2.22433  |   |          |          |          |
| C                        | 5.19306  | -0.45989 | 3.09108  |   |          |          |          |
| H                        | 4.04546  | 1.3612   | 3.07294  |   |          |          |          |
| C                        | 5.18609  | -1.81801 | 2.78905  |   |          |          |          |

**(P)-Ant-C3**

|   |          |          |          |
|---|----------|----------|----------|
| C | 1.10097  | 0.99026  | -3.36414 |
| C | 1.62362  | 0.50541  | -2.18427 |
| C | 0.82445  | 0.59524  | -0.9763  |
| C | -0.59321 | 0.82677  | -1.12869 |
| C | -1.0651  | 1.35879  | -2.37193 |
| C | -0.22284 | 1.49386  | -3.44144 |
| C | 1.34454  | 0.48998  | 0.33492  |
| C | -1.46769 | 0.51591  | -0.05943 |
| C | -0.94047 | 0.10011  | 1.18504  |
| C | 0.46761  | 0.30448  | 1.43066  |
| C | 0.91477  | 0.30303  | 2.79327  |
| H | 1.94059  | 0.57526  | 3.01038  |
| C | 0.06711  | -0.03676 | 3.81257  |
| C | -1.23662 | -0.52462 | 3.52178  |
| C | -1.73149 | -0.50807 | 2.24073  |
| H | 1.69488  | 0.91534  | -4.26991 |
| H | -2.10467 | 1.64902  | -2.46039 |
| H | -0.58728 | 1.90703  | -4.37699 |
| H | 0.41679  | -0.01985 | 4.84035  |
| H | -1.82092 | -0.99181 | 4.30897  |
| C | -2.93488 | 0.73508  | -0.23464 |
| C | -3.57934 | 1.72821  | 0.51349  |
| C | -3.69136 | -0.00372 | -1.15352 |
| C | -4.94786 | 1.95599  | 0.3657   |
| H | -3.00831 | 2.31873  | 1.22176  |
| C | -5.05861 | 0.23069  | -1.30164 |
| H | -3.21487 | -0.78378 | -1.73655 |
| C | -5.69765 | 1.20999  | -0.54218 |
| H | -6.76073 | 1.38307  | -0.6508  |
| C | 2.80873  | 0.64466  | 0.57551  |
| C | 3.45134  | 1.83667  | 0.21491  |
| C | 3.57363  | -0.37196 | 1.16073  |
| C | 4.82277  | 1.99499  | 0.40917  |
| H | 2.87379  | 2.64065  | -0.22803 |
| C | 4.94628  | -0.20954 | 1.35385  |
| H | 3.09593  | -1.30128 | 1.45018  |
| C | 5.58186  | 0.97215  | 0.97696  |
| H | 6.64674  | 1.09522  | 1.1273   |
| C | 2.90076  | -0.26223 | -2.27466 |
| C | 2.92129  | -1.64266 | -1.94754 |
| C | 4.04898  | 0.30011  | -2.84225 |
| C | 4.05483  | -2.41235 | -2.22433 |
| C | 5.19306  | -0.45989 | -3.09108 |
| H | 4.04546  | 1.3612   | -3.07294 |
| C | 5.18609  | -1.81801 | -2.78905 |
| H | 4.06574  | -3.47483 | -2.01524 |
| H | 6.07347  | 0.00697  | -3.52067 |
| H | 6.06048  | -2.42996 | -2.98954 |
| C | -2.92397 | -1.34279 | 1.89741  |
| C | -2.68334 | -2.56552 | 1.23072  |
| C | -4.2412  | -1.0234  | 2.24542  |
| C | -3.74446 | -3.38775 | 0.84684  |
| C | -5.30195 | -1.85162 | 1.8751   |

|   |          |          |          |
|---|----------|----------|----------|
| H | -4.44022 | -0.09607 | 2.77344  |
| C | -5.05467 | -3.02155 | 1.15591  |
| H | -3.535   | -4.32728 | 0.34463  |
| H | -6.31841 | -1.57786 | 2.14045  |
| H | -5.87743 | -3.66436 | 0.85749  |
| O | 1.78421  | -2.13298 | -1.363   |
| O | -1.37686 | -2.98355 | 1.10671  |
| C | 1.65213  | -3.5176  | -1.03557 |
| H | 2.60678  | -3.92828 | -0.6897  |
| H | 1.34811  | -4.07748 | -1.93153 |
| C | -0.77101 | -3.13923 | -0.18404 |
| H | -0.7423  | -2.17477 | -0.70214 |
| H | -1.33651 | -3.85105 | -0.8017  |
| C | 0.644    | -3.6433  | 0.10227  |
| H | 1.02024  | -3.06873 | 0.9547   |
| H | 0.60435  | -4.69198 | 0.41886  |
| C | -5.83217 | -0.56898 | -2.31677 |
| C | -5.62329 | 2.95157  | 1.26934  |
| C | 5.73938  | -1.35987 | 1.91483  |
| C | 5.48869  | 3.25374  | -0.07817 |
| F | 5.88247  | -2.3498  | 1.00298  |
| F | 5.12615  | -1.9087  | 2.98861  |
| F | 6.97794  | -0.9873  | 2.29919  |
| F | 6.69128  | 3.45129  | 0.50112  |
| F | 5.69458  | 3.21152  | -1.41772 |
| F | 4.73259  | 4.34677  | 0.16397  |
| F | -7.16345 | -0.50889 | -2.10233 |
| F | -5.61033 | -0.11936 | -3.57428 |
| F | -5.47402 | -1.87209 | -2.30013 |
| F | -5.84519 | 2.4195   | 2.49829  |
| F | -6.81987 | 3.34824  | 0.78885  |
| F | -4.86854 | 4.05565  | 1.45533  |

**(M)-Ant-C4**

|   |          |          |          |
|---|----------|----------|----------|
| C | 1.25231  | 0.74105  | 3.49981  |
| C | 1.765    | 0.33763  | 2.29015  |
| C | 0.94782  | 0.47695  | 1.09438  |
| C | -0.46899 | 0.70276  | 1.265    |
| C | -0.93416 | 1.1314   | 2.55206  |
| C | -0.08396 | 1.20825  | 3.62016  |
| C | 1.45668  | 0.43711  | -0.22346 |
| C | -1.3524  | 0.51825  | 0.17348  |
| C | -0.85066 | 0.21112  | -1.11377 |
| C | 0.57523  | 0.34916  | -1.32982 |
| C | 1.05753  | 0.41801  | -2.67686 |
| H | 2.1075   | 0.61762  | -2.84967 |
| C | 0.21596  | 0.23881  | -3.73886 |
| C | -1.13834 | -0.117   | -3.51513 |
| C | -1.6744  | -0.17408 | -2.24845 |
| H | 1.85961  | 0.62604  | 4.3927   |
| H | -1.97648 | 1.39987  | 2.67107  |
| H | -0.44809 | 1.55013  | 4.58426  |
| H | 0.59385  | 0.30572  | -4.75454 |
| H | -1.75913 | -0.40646 | -4.35753 |
| C | -2.81113 | 0.76891  | 0.3893   |
| C | -3.39668 | 1.93221  | -0.12218 |
| C | -3.60986 | -0.1138  | 1.12686  |
| C | -4.75414 | 2.19123  | 0.07339  |
| H | -2.78914 | 2.63536  | -0.68192 |
| C | -4.96638 | 0.14782  | 1.31919  |
| H | -3.16921 | -1.01282 | 1.54272  |
| C | -5.54885 | 1.30059  | 0.79158  |
| H | -6.60116 | 1.50396  | 0.94513  |
| C | 2.91865  | 0.6264   | -0.47514 |
| C | 3.51365  | 1.85442  | -0.15927 |
| C | 3.7172   | -0.37313 | -1.04342 |
| C | 4.8752   | 2.06436  | -0.3772  |
| H | 2.90844  | 2.64527  | 0.2704   |
| C | 5.07868  | -0.15852 | -1.2625  |
| H | 3.27741  | -1.33163 | -1.29581 |
| C | 5.66836  | 1.05981  | -0.92945 |
| H | 6.72644  | 1.22021  | -1.09185 |
| C | 3.0406   | -0.44368 | 2.28483  |
| C | 2.95529  | -1.83485 | 2.03636  |
| C | 4.29124  | 0.0993   | 2.58803  |
| C | 4.10349  | -2.6286  | 2.01493  |
| C | 5.44237  | -0.69349 | 2.58492  |
| H | 4.37117  | 1.16478  | 2.78102  |
| C | 5.34668  | -2.05033 | 2.283    |
| H | 4.02743  | -3.69177 | 1.81346  |
| H | 6.4071   | -0.2469  | 2.80386  |
| H | 6.23777  | -2.67081 | 2.26511  |
| C | -3.03511 | -0.78846 | -2.12582 |
| C | -3.15621 | -2.11032 | -1.63283 |
| C | -4.18312 | -0.15769 | -2.61098 |
| C | -4.40102 | -2.74511 | -1.60211 |
| C | -5.43052 | -0.78661 | -2.58273 |
| H | -4.1001  | 0.8557   | -2.99176 |

|   |          |          |          |
|---|----------|----------|----------|
| C | -5.53444 | -2.07696 | -2.07242 |
| H | -4.4941  | -3.75508 | -1.2215  |
| H | -6.30848 | -0.26626 | -2.95175 |
| H | -6.49744 | -2.57737 | -2.03729 |
| O | 1.69053  | -2.32253 | 1.87496  |
| O | -1.99317 | -2.69639 | -1.21932 |
| C | 1.43308  | -3.46813 | 1.06173  |
| H | 2.01403  | -3.40495 | 0.13051  |
| H | 1.72761  | -4.39109 | 1.5813   |
| C | -1.99807 | -4.03582 | -0.72613 |
| H | -2.6765  | -4.11984 | 0.13551  |
| H | -2.35262 | -4.72358 | -1.50586 |
| C | -5.8194  | -0.85995 | 2.04341  |
| C | -5.36502 | 3.40343  | -0.57587 |
| C | 5.89689  | -1.25961 | -1.88345 |
| C | 5.49649  | 3.3561   | 0.08007  |
| F | 5.63643  | -2.45473 | -1.30681 |
| F | 5.62308  | -1.39777 | -3.20227 |
| F | 7.22257  | -1.03434 | -1.77255 |
| F | 6.68691  | 3.58807  | -0.51119 |
| F | 5.71378  | 3.34514  | 1.41972  |
| F | 4.69846  | 4.41549  | -0.17455 |
| F | -6.9173  | -0.29245 | 2.58843  |
| F | -5.13747 | -1.46864 | 3.03957  |
| F | -6.25054 | -1.83663 | 1.21164  |
| F | -5.57022 | 3.19516  | -1.90053 |
| F | -6.5587  | 3.72565  | -0.03595 |
| F | -4.56301 | 4.48573  | -0.47364 |
| C | -0.06579 | -3.41997 | 0.78057  |
| H | -0.60933 | -3.60575 | 1.71539  |
| H | -0.29497 | -2.39488 | 0.481    |
| C | -0.5635  | -4.36512 | -0.3176  |
| H | 0.07293  | -4.28016 | -1.20708 |
| H | -0.52687 | -5.41329 | 0.00446  |

**(P)-Ant-C4**

|   |          |          |          |
|---|----------|----------|----------|
| C | 1.25231  | 0.74105  | -3.49981 |
| C | 1.765    | 0.33763  | -2.29015 |
| C | 0.94782  | 0.47695  | -1.09438 |
| C | -0.46899 | 0.70276  | -1.265   |
| C | -0.93416 | 1.1314   | -2.55206 |
| C | -0.08396 | 1.20825  | -3.62016 |
| C | 1.45668  | 0.43711  | 0.22346  |
| C | -1.3524  | 0.51825  | -0.17348 |
| C | -0.85066 | 0.21112  | 1.11377  |
| C | 0.57523  | 0.34916  | 1.32982  |
| C | 1.05753  | 0.41801  | 2.67686  |
| H | 2.1075   | 0.61762  | 2.84967  |
| C | 0.21596  | 0.23881  | 3.73886  |
| C | -1.13834 | -0.117   | 3.51513  |
| C | -1.6744  | -0.17408 | 2.24845  |
| H | 1.85961  | 0.62604  | -4.3927  |
| H | -1.97648 | 1.39987  | -2.67107 |
| H | -0.44809 | 1.55013  | -4.58426 |
| H | 0.59385  | 0.30572  | 4.75454  |
| H | -1.75913 | -0.40646 | 4.35753  |
| C | -2.81113 | 0.76891  | -0.3893  |
| C | -3.39668 | 1.93221  | 0.12218  |
| C | -3.60986 | -0.1138  | -1.12686 |
| C | -4.75414 | 2.19123  | -0.07339 |
| H | -2.78914 | 2.63536  | 0.68192  |
| C | -4.96638 | 0.14782  | -1.31919 |
| H | -3.16921 | -1.01282 | -1.54272 |
| C | -5.54885 | 1.30059  | -0.79158 |
| H | -6.60116 | 1.50396  | -0.94513 |
| C | 2.91865  | 0.6264   | 0.47514  |
| C | 3.51365  | 1.85442  | 0.15927  |
| C | 3.7172   | -0.37313 | 1.04342  |
| C | 4.8752   | 2.06436  | 0.3772   |
| H | 2.90844  | 2.64527  | -0.2704  |
| C | 5.07868  | -0.15852 | 1.2625   |
| H | 3.27741  | -1.33163 | 1.29581  |
| C | 5.66836  | 1.05981  | 0.92945  |
| H | 6.72644  | 1.22021  | 1.09185  |
| C | 3.0406   | -0.44368 | -2.28483 |
| C | 2.95529  | -1.83485 | -2.03636 |
| C | 4.29124  | 0.0993   | -2.58803 |
| C | 4.10349  | -2.6286  | -2.01493 |
| C | 5.44237  | -0.69349 | -2.58492 |
| H | 4.37117  | 1.16478  | -2.78102 |
| C | 5.34668  | -2.05033 | -2.283   |
| H | 4.02743  | -3.69177 | -1.81346 |
| H | 6.4071   | -0.2469  | -2.80386 |
| H | 6.23777  | -2.67081 | -2.26511 |
| C | -3.03511 | -0.78846 | 2.12582  |
| C | -3.15621 | -2.11032 | 1.63283  |
| C | -4.18312 | -0.15769 | 2.61098  |
| C | -4.40102 | -2.74511 | 1.60211  |
| C | -5.43052 | -0.78661 | 2.58273  |
| H | -4.1001  | 0.8557   | 2.99176  |

|   |          |          |          |
|---|----------|----------|----------|
| C | -5.53444 | -2.07696 | 2.07242  |
| H | -4.4941  | -3.75508 | 1.2215   |
| H | -6.30848 | -0.26626 | 2.95175  |
| H | -6.49744 | -2.57737 | 2.03729  |
| O | 1.69053  | -2.32253 | -1.87496 |
| O | -1.99317 | -2.69639 | 1.21932  |
| C | 1.43308  | -3.46813 | -1.06173 |
| H | 2.01403  | -3.40495 | -0.13051 |
| H | 1.72761  | -4.39109 | -1.5813  |
| C | -1.99807 | -4.03582 | 0.72613  |
| H | -2.6765  | -4.11984 | -0.13551 |
| H | -2.35262 | -4.72358 | 1.50586  |
| C | -5.8194  | -0.85995 | -2.04341 |
| C | -5.36502 | 3.40343  | 0.57587  |
| C | 5.89689  | -1.25961 | 1.88345  |
| C | 5.49649  | 3.3561   | -0.08007 |
| F | 5.63643  | -2.45473 | 1.30681  |
| F | 5.62308  | -1.39777 | 3.20227  |
| F | 7.22257  | -1.03434 | 1.77255  |
| F | 6.68691  | 3.58807  | 0.51119  |
| F | 5.71378  | 3.34514  | -1.41972 |
| F | 4.69846  | 4.41549  | 0.17455  |
| F | -6.9173  | -0.29245 | -2.58843 |
| F | -5.13747 | -1.46864 | -3.03957 |
| F | -6.25054 | -1.83663 | -1.21164 |
| F | -5.57022 | 3.19516  | 1.90053  |
| F | -6.5587  | 3.72565  | 0.03595  |
| F | -4.56301 | 4.48573  | 0.47364  |
| C | -0.06579 | -3.41997 | -0.78057 |
| H | -0.60933 | -3.60575 | -1.71539 |
| H | -0.29497 | -2.39488 | -0.481   |
| C | -0.5635  | -4.36512 | 0.3176   |
| H | 0.07293  | -4.28016 | 1.20708  |
| H | -0.52687 | -5.41329 | -0.00446 |

**(M)-Ant-C5**

|   |          |          |          |
|---|----------|----------|----------|
| C | 1.29975  | 1.04568  | 3.4345   |
| C | 1.80369  | 0.57083  | 2.24724  |
| C | 0.9863   | 0.65451  | 1.04835  |
| C | -0.42741 | 0.89282  | 1.20874  |
| C | -0.88742 | 1.39541  | 2.47126  |
| C | -0.03296 | 1.52971  | 3.53047  |
| C | 1.49537  | 0.52366  | -0.26163 |
| C | -1.31345 | 0.63988  | 0.13477  |
| C | -0.81563 | 0.24424  | -1.13066 |
| C | 0.61267  | 0.35521  | -1.35666 |
| C | 1.10009  | 0.31103  | -2.70213 |
| H | 2.15144  | 0.49174  | -2.88539 |
| C | 0.26344  | 0.04708  | -3.74971 |
| C | -1.09731 | -0.26105 | -3.5033  |
| C | -1.64096 | -0.20053 | -2.23927 |
| H | 1.90627  | 0.96982  | 4.33215  |
| H | -1.92943 | 1.66969  | 2.57976  |
| H | -0.39312 | 1.92589  | 4.47511  |
| H | 0.64578  | 0.02425  | -4.76566 |
| H | -1.72583 | -0.59117 | -4.32468 |
| C | -2.77022 | 0.90248  | 0.35514  |
| C | -3.34667 | 2.07963  | -0.13417 |
| C | -3.57314 | 0.01321  | 1.07862  |
| C | -4.70225 | 2.34422  | 0.06698  |
| H | -2.73555 | 2.78589  | -0.68614 |
| C | -4.92733 | 0.28204  | 1.27883  |
| H | -3.14219 | -0.90643 | 1.45835  |
| C | -5.50205 | 1.44757  | 0.77262  |
| H | -6.55571 | 1.64881  | 0.91911  |
| C | 2.95944  | 0.68559  | -0.51911 |
| C | 3.56844  | 1.9175   | -0.2532  |
| C | 3.74733  | -0.34649 | -1.04727 |
| C | 4.93258  | 2.10436  | -0.48234 |
| H | 2.97233  | 2.73276  | 0.14217  |
| C | 5.10832  | -0.15422 | -1.28094 |
| H | 3.29538  | -1.30638 | -1.26841 |
| C | 5.71225  | 1.07168  | -0.99732 |
| H | 6.76867  | 1.22062  | -1.18306 |
| C | 3.05852  | -0.23797 | 2.27313  |
| C | 2.94478  | -1.62752 | 2.01656  |
| C | 4.31005  | 0.27449  | 2.61666  |
| C | 4.07288  | -2.44964 | 2.04442  |
| C | 5.44039  | -0.54718 | 2.66324  |
| H | 4.40708  | 1.33927  | 2.80685  |
| C | 5.31873  | -1.90139 | 2.36474  |
| H | 3.98858  | -3.50838 | 1.82768  |
| H | 6.40776  | -0.12479 | 2.91553  |
| H | 6.19312  | -2.54491 | 2.37908  |
| C | -3.04322 | -0.71061 | -2.10801 |
| C | -3.28951 | -2.00868 | -1.60432 |
| C | -4.12192 | 0.01439  | -2.62544 |
| C | -4.58933 | -2.5284  | -1.61057 |
| C | -5.41962 | -0.4987  | -2.6291  |
| H | -3.93626 | 1.00859  | -3.02    |

|   |          |          |          |
|---|----------|----------|----------|
| C | -5.64783 | -1.77289 | -2.11792 |
| H | -4.78513 | -3.51974 | -1.22112 |
| H | -6.23668 | 0.09457  | -3.02676 |
| H | -6.64997 | -2.19139 | -2.11064 |
| O | 1.67503  | -2.06219 | 1.77499  |
| O | -2.20765 | -2.71002 | -1.12966 |
| C | 1.40442  | -3.38585 | 1.32839  |
| H | 1.82461  | -3.5381  | 0.32259  |
| H | 1.86339  | -4.12656 | 1.99863  |
| C | -2.31144 | -4.14056 | -1.1073  |
| H | -3.04906 | -4.45819 | -0.35672 |
| C | -5.7582  | -0.68461 | 2.0804   |
| C | -5.312   | 3.56021  | -0.57562 |
| C | 5.94912  | -1.29914 | -1.78123 |
| C | 5.5638   | 3.41303  | -0.09118 |
| F | 6.45941  | -2.02865 | -0.76254 |
| F | 5.23301  | -2.14854 | -2.55163 |
| F | 6.99651  | -0.86667 | -2.51744 |
| F | 6.76336  | 3.59864  | -0.68056 |
| F | 5.76476  | 3.47654  | 1.24899  |
| F | 4.7807   | 4.4648   | -0.41579 |
| F | -7.0774  | -0.55147 | 1.82613  |
| F | -5.5899  | -0.49941 | 3.41072  |
| F | -5.42019 | -1.96784 | 1.82043  |
| F | -5.54845 | 3.3474   | -1.89439 |
| F | -6.49049 | 3.89928  | -0.01242 |
| F | -4.49554 | 4.63356  | -0.49624 |
| C | -0.11534 | -3.5354  | 1.33736  |
| H | -0.44634 | -3.46981 | 2.37952  |
| H | -0.55342 | -2.68133 | 0.8129   |
| C | -0.59489 | -4.8551  | 0.70221  |
| H | -1.47367 | -5.22281 | 1.2462   |
| H | 0.1742   | -5.62729 | 0.83961  |
| C | -0.95588 | -4.77619 | -0.7931  |
| H | -0.18017 | -4.25102 | -1.36336 |
| H | -0.99525 | -5.79721 | -1.19278 |
| H | -2.67007 | -4.47754 | -2.08919 |



**(P)-Ant-C5**

|   |          |          |          |
|---|----------|----------|----------|
| C | 1.29975  | 1.04568  | -3.4345  |
| C | 1.80369  | 0.57083  | -2.24724 |
| C | 0.9863   | 0.65451  | -1.04835 |
| C | -0.42741 | 0.89282  | -1.20874 |
| C | -0.88742 | 1.39541  | -2.47126 |
| C | -0.03296 | 1.52971  | -3.53047 |
| C | 1.49537  | 0.52366  | 0.26163  |
| C | -1.31345 | 0.63988  | -0.13477 |
| C | -0.81563 | 0.24424  | 1.13066  |
| C | 0.61267  | 0.35521  | 1.35666  |
| C | 1.10009  | 0.31103  | 2.70213  |
| H | 2.15144  | 0.49174  | 2.88539  |
| C | 0.26344  | 0.04708  | 3.74971  |
| C | -1.09731 | -0.26105 | 3.5033   |
| C | -1.64096 | -0.20053 | 2.23927  |
| H | 1.90627  | 0.96982  | -4.33215 |
| H | -1.92943 | 1.66969  | -2.57976 |
| H | -0.39312 | 1.92589  | -4.47511 |
| H | 0.64578  | 0.02425  | 4.76566  |
| H | -1.72583 | -0.59117 | 4.32468  |
| C | -2.77022 | 0.90248  | -0.35514 |
| C | -3.34667 | 2.07963  | 0.13417  |
| C | -3.57314 | 0.01321  | -1.07862 |
| C | -4.70225 | 2.34422  | -0.06698 |
| H | -2.73555 | 2.78589  | 0.68614  |
| C | -4.92733 | 0.28204  | -1.27883 |
| H | -3.14219 | -0.90643 | -1.45835 |
| C | -5.50205 | 1.44757  | -0.77262 |
| H | -6.55571 | 1.64881  | -0.91911 |
| C | 2.95944  | 0.68559  | 0.51911  |
| C | 3.56844  | 1.9175   | 0.2532   |
| C | 3.74733  | -0.34649 | 1.04727  |
| C | 4.93258  | 2.10436  | 0.48234  |
| H | 2.97233  | 2.73276  | -0.14217 |
| C | 5.10832  | -0.15422 | 1.28094  |
| H | 3.29538  | -1.30638 | 1.26841  |
| C | 5.71225  | 1.07168  | 0.99732  |
| H | 6.76867  | 1.22062  | 1.18306  |
| C | 3.05852  | -0.23797 | -2.27313 |
| C | 2.94478  | -1.62752 | -2.01656 |
| C | 4.31005  | 0.27449  | -2.61666 |
| C | 4.07288  | -2.44964 | -2.04442 |
| C | 5.44039  | -0.54718 | -2.66324 |
| H | 4.40708  | 1.33927  | -2.80685 |
| C | 5.31873  | -1.90139 | -2.36474 |
| H | 3.98858  | -3.50838 | -1.82768 |
| H | 6.40776  | -0.12479 | -2.91553 |
| H | 6.19312  | -2.54491 | -2.37908 |
| C | -3.04322 | -0.71061 | 2.10801  |
| C | -3.28951 | -2.00868 | 1.60432  |
| C | -4.12192 | 0.01439  | 2.62544  |
| C | -4.58933 | -2.5284  | 1.61057  |
| C | -5.41962 | -0.4987  | 2.6291   |
| H | -3.93626 | 1.00859  | 3.02     |
| C | -5.64783 | -1.77289 | 2.11792  |

|   |          |          |          |
|---|----------|----------|----------|
| H | -4.78513 | -3.51974 | 1.22112  |
| H | -6.23668 | 0.09457  | 3.02676  |
| H | -6.64997 | -2.19139 | 2.11064  |
| O | 1.67503  | -2.06219 | -1.77499 |
| O | -2.20765 | -2.71002 | 1.12966  |
| C | 1.40442  | -3.38585 | -1.32839 |
| H | 1.82461  | -3.5381  | -0.32259 |
| H | 1.86339  | -4.12656 | -1.99863 |
| C | -2.31144 | -4.14056 | 1.1073   |
| H | -3.04906 | -4.45819 | 0.35672  |
| C | -5.7582  | -0.68461 | -2.0804  |
| C | -5.312   | 3.56021  | 0.57562  |
| C | 5.94912  | -1.29914 | 1.78123  |
| C | 5.5638   | 3.41303  | 0.09118  |
| F | 6.45941  | -2.02865 | 0.76254  |
| F | 5.23301  | -2.14854 | 2.55163  |
| F | 6.99651  | -0.86667 | 2.51744  |
| F | 6.76336  | 3.59864  | 0.68056  |
| F | 5.76476  | 3.47654  | -1.24899 |
| F | 4.7807   | 4.4648   | 0.41579  |
| F | -7.0774  | -0.55147 | -1.82613 |
| F | -5.5899  | -0.49941 | -3.41072 |
| F | -5.42019 | -1.96784 | -1.82043 |
| F | -5.54845 | 3.3474   | 1.89439  |
| F | -6.49049 | 3.89928  | 0.01242  |
| F | -4.49554 | 4.63356  | 0.49624  |
| C | -0.11534 | -3.5354  | -1.33736 |
| H | -0.44634 | -3.46981 | -2.37952 |
| H | -0.55342 | -2.68133 | -0.8129  |
| C | -0.59489 | -4.8551  | -0.70221 |
| H | -1.47367 | -5.22281 | -1.2462  |
| H | 0.1742   | -5.62729 | -0.83961 |
| C | -0.95588 | -4.77619 | 0.7931   |
| H | -0.18017 | -4.25102 | 1.36336  |
| H | -0.99525 | -5.79721 | 1.19278  |
| H | -2.67007 | -4.47754 | 2.08919  |

**(M)-Ant-C6**

|   |          |          |          |
|---|----------|----------|----------|
| C | -1.13448 | -1.44188 | 3.36662  |
| C | -1.69629 | -0.96117 | 2.20337  |
| C | -0.86805 | -0.85845 | 1.00925  |
| C | 0.56515  | -1.0135  | 1.16638  |
| C | 1.0722   | -1.51698 | 2.40813  |
| C | 0.2402   | -1.76853 | 3.46164  |
| C | -1.36164 | -0.66879 | -0.30255 |
| C | 1.44738  | -0.69516 | 0.10357  |
| C | 0.94811  | -0.30992 | -1.16184 |
| C | -0.47523 | -0.45294 | -1.38894 |
| C | -0.95789 | -0.40882 | -2.73829 |
| H | -2.00497 | -0.60514 | -2.92838 |
| C | -0.11959 | -0.14216 | -3.78338 |
| C | 1.23477  | 0.19504  | -3.53432 |
| C | 1.77064  | 0.15662  | -2.26825 |
| H | -1.75836 | -1.51504 | 4.25187  |
| H | 2.13381  | -1.7029  | 2.50568  |
| H | 0.63665  | -2.16235 | 4.39254  |
| H | -0.49885 | -0.13179 | -4.80069 |
| H | 1.8566   | 0.54357  | -4.35326 |
| C | 2.91178  | -0.92063 | 0.32421  |
| C | 3.513    | -2.07793 | -0.18251 |
| C | 3.69523  | -0.03199 | 1.06939  |
| C | 4.87175  | -2.32283 | 0.02292  |
| H | 2.91732  | -2.78573 | -0.74913 |
| C | 5.05282  | -0.2798  | 1.27289  |
| H | 3.24576  | 0.8677   | 1.47459  |
| C | 5.65151  | -1.42574 | 0.74954  |
| H | 6.70752  | -1.61119 | 0.89961  |
| C | -2.82251 | -0.75693 | -0.60741 |
| C | -3.50457 | -1.97444 | -0.50993 |
| C | -3.53325 | 0.37325  | -1.02843 |
| C | -4.8691  | -2.0499  | -0.79351 |
| H | -2.96913 | -2.86527 | -0.19966 |
| C | -4.89735 | 0.29629  | -1.30623 |
| H | -3.01729 | 1.32258  | -1.11248 |
| C | -5.57678 | -0.91589 | -1.18891 |
| H | -6.63817 | -0.97479 | -1.39431 |
| C | -3.10419 | -0.4683  | 2.32734  |
| C | -3.38972 | 0.90952  | 2.18011  |
| C | -4.13558 | -1.31087 | 2.75261  |
| C | -4.67209 | 1.40329  | 2.43306  |
| C | -5.42099 | -0.82642 | 3.00603  |
| H | -3.92662 | -2.3704  | 2.86714  |
| C | -5.68311 | 0.53123  | 2.84615  |
| H | -4.88629 | 2.45863  | 2.31231  |
| H | -6.20548 | -1.50793 | 3.31828  |
| H | -6.67721 | 0.92423  | 3.03835  |
| C | 3.13614  | 0.75227  | -2.10341 |
| C | 3.2502   | 2.07032  | -1.60729 |
| C | 4.29575  | 0.10385  | -2.54142 |
| C | 4.50464  | 2.68054  | -1.50475 |
| C | 5.54915  | 0.70838  | -2.43883 |
| H | 4.21564  | -0.90444 | -2.93575 |
| C | 5.64929  | 1.99441  | -1.91049 |

|   |          |          |          |
|---|----------|----------|----------|
| H | 4.5905   | 3.69819  | -1.14022 |
| H | 6.43639  | 0.17552  | -2.76562 |
| H | 6.61787  | 2.47849  | -1.8266  |
| O | -2.33671 | 1.68087  | 1.78818  |
| O | 2.07153  | 2.71531  | -1.33875 |
| C | -2.48403 | 3.09025  | 1.61517  |
| H | -3.21351 | 3.29793  | 0.81911  |
| H | -2.85106 | 3.55404  | 2.54166  |
| C | 1.95192  | 3.66376  | -0.27298 |
| H | 2.92308  | 4.08416  | 0.00672  |
| C | 5.86026  | 0.68519  | 2.09995  |
| C | 5.50468  | -3.51847 | -0.63534 |
| C | -5.62025 | 1.53712  | -1.75583 |
| C | -5.58785 | -3.35401 | -0.57452 |
| F | -5.20122 | 2.63092  | -1.07136 |
| F | -5.40373 | 1.79629  | -3.06586 |
| F | -6.95442 | 1.44066  | -1.58433 |
| F | -6.76615 | -3.40363 | -1.2311  |
| F | -5.85561 | -3.55288 | 0.73895  |
| F | -4.84672 | -4.40754 | -0.98343 |
| F | 7.18341  | 0.57914  | 1.85519  |
| F | 5.68325  | 0.47172  | 3.42511  |
| F | 5.50236  | 1.96722  | 1.86162  |
| F | 5.73397  | -3.2846  | -1.95193 |
| F | 6.69071  | -3.84058 | -0.07839 |
| F | 4.71007  | -4.60872 | -0.56772 |
| C | -1.09527 | 3.59837  | 1.24673  |
| H | -0.42584 | 3.41172  | 2.0957   |
| H | -0.73626 | 2.9725   | 0.42285  |
| C | -1.04374 | 5.0751   | 0.8442   |
| H | -1.72619 | 5.24211  | -0.00085 |
| C | 0.99569  | 4.77048  | -0.72537 |
| H | 0.2096   | 4.3055   | -1.33197 |
| H | 1.53789  | 5.44299  | -1.39883 |
| C | 0.36238  | 5.56202  | 0.44199  |
| H | 0.28918  | 6.61943  | 0.16559  |
| H | 1.02577  | 5.53018  | 1.31789  |
| H | -1.41546 | 5.70007  | 1.66698  |
| H | 1.5586   | 3.13672  | 0.60539  |

**(P)-Ant-C6**

|   |          |          |          |   |          |          |          |
|---|----------|----------|----------|---|----------|----------|----------|
| C | -1.13448 | -1.44188 | -3.36662 | H | 4.21564  | -0.90444 | 2.93575  |
| C | -1.69629 | -0.96117 | -2.20337 | C | 5.64929  | 1.99441  | 1.91049  |
| C | -0.86805 | -0.85845 | -1.00925 | H | 4.5905   | 3.69819  | 1.14022  |
| C | 0.56515  | -1.0135  | -1.16638 | H | 6.43639  | 0.17552  | 2.76562  |
| C | 1.0722   | -1.51698 | -2.40813 | H | 6.61787  | 2.47849  | 1.8266   |
| C | 0.2402   | -1.76853 | -3.46164 | O | -2.33671 | 1.68087  | -1.78818 |
| C | -1.36164 | -0.66879 | 0.30255  | O | 2.07153  | 2.71531  | 1.33875  |
| C | 1.44738  | -0.69516 | -0.10357 | C | -2.48403 | 3.09025  | -1.61517 |
| C | 0.94811  | -0.30992 | 1.16184  | H | -3.21351 | 3.29793  | -0.81911 |
| C | -0.47523 | -0.45294 | 1.38894  | H | -2.85106 | 3.55404  | -2.54166 |
| C | -0.95789 | -0.40882 | 2.73829  | C | 1.95192  | 3.66376  | 0.27298  |
| H | -2.00497 | -0.60514 | 2.92838  | H | 2.92308  | 4.08416  | -0.00672 |
| C | -0.11959 | -0.14216 | 3.78338  | C | 5.86026  | 0.68519  | -2.09995 |
| C | 1.23477  | 0.19504  | 3.53432  | C | 5.50468  | -3.51847 | 0.63534  |
| C | 1.77064  | 0.15662  | 2.26825  | C | -5.62025 | 1.53712  | 1.75583  |
| H | -1.75836 | -1.51504 | -4.25187 | C | -5.58785 | -3.35401 | 0.57452  |
| H | 2.13381  | -1.7029  | -2.50568 | F | -5.20122 | 2.63092  | 1.07136  |
| H | 0.63665  | -2.16235 | -4.39254 | F | -5.40373 | 1.79629  | 3.06586  |
| H | -0.49885 | -0.13179 | 4.80069  | F | -6.95442 | 1.44066  | 1.58433  |
| H | 1.8566   | 0.54357  | 4.35326  | F | -6.76615 | -3.40363 | 1.2311   |
| C | 2.91178  | -0.92063 | -0.32421 | F | -5.85561 | -3.55288 | -0.73895 |
| C | 3.513    | -2.07793 | 0.18251  | F | -4.84672 | -4.40754 | 0.98343  |
| C | 3.69523  | -0.03199 | -1.06939 | F | 7.18341  | 0.57914  | -1.85519 |
| C | 4.87175  | -2.32283 | -0.02292 | F | 5.68325  | 0.47172  | -3.42511 |
| H | 2.91732  | -2.78573 | 0.74913  | F | 5.50236  | 1.96722  | -1.86162 |
| C | 5.05282  | -0.2798  | -1.27289 | F | 5.73397  | -3.2846  | 1.95193  |
| H | 3.24576  | 0.8677   | -1.47459 | F | 6.69071  | -3.84058 | 0.07839  |
| C | 5.65151  | -1.42574 | -0.74954 | F | 4.71007  | -4.60872 | 0.56772  |
| H | 6.70752  | -1.61119 | -0.89961 | C | -1.09527 | 3.59837  | -1.24673 |
| C | -2.82251 | -0.75693 | 0.60741  | H | -0.42584 | 3.41172  | -2.0957  |
| C | -3.50457 | -1.97444 | 0.50993  | H | -0.73626 | 2.9725   | -0.42285 |
| C | -3.53325 | 0.37325  | 1.02843  | C | -1.04374 | 5.0751   | -0.8442  |
| C | -4.8691  | -2.0499  | 0.79351  | H | -1.72619 | 5.24211  | 0.00085  |
| H | -2.96913 | -2.86527 | 0.19966  | C | 0.99569  | 4.77048  | 0.72537  |
| C | -4.89735 | 0.29629  | 1.30623  | H | 0.2096   | 4.3055   | 1.33197  |
| H | -3.01729 | 1.32258  | 1.11248  | H | 1.53789  | 5.44299  | 1.39883  |
| C | -5.57678 | -0.91589 | 1.18891  | C | 0.36238  | 5.56202  | -0.44199 |
| H | -6.63817 | -0.97479 | 1.39431  | H | 0.28918  | 6.61943  | -0.16559 |
| C | -3.10419 | -0.4683  | -2.32734 | H | 1.02577  | 5.53018  | -1.31789 |
| C | -3.38972 | 0.90952  | -2.18011 | H | -1.41546 | 5.70007  | -1.66698 |
| C | -4.13558 | -1.31087 | -2.75261 | H | 1.5586   | 3.13672  | -0.60539 |
| C | -4.67209 | 1.40329  | -2.43306 |   |          |          |          |
| C | -5.42099 | -0.82642 | -3.00603 |   |          |          |          |
| H | -3.92662 | -2.3704  | -2.86714 |   |          |          |          |
| C | -5.68311 | 0.53123  | -2.84615 |   |          |          |          |
| H | -4.88629 | 2.45863  | -2.31231 |   |          |          |          |
| H | -6.20548 | -1.50793 | -3.31828 |   |          |          |          |
| H | -6.67721 | 0.92423  | -3.03835 |   |          |          |          |
| C | 3.13614  | 0.75227  | 2.10341  |   |          |          |          |
| C | 3.2502   | 2.07032  | 1.60729  |   |          |          |          |
| C | 4.29575  | 0.10385  | 2.54142  |   |          |          |          |
| C | 4.50464  | 2.68054  | 1.50475  |   |          |          |          |
| C | 5.54915  | 0.70838  | 2.43883  |   |          |          |          |

#### 4. Analogue molecule

Fig. S3. Optimized structure of the (*M*)-enantiomer

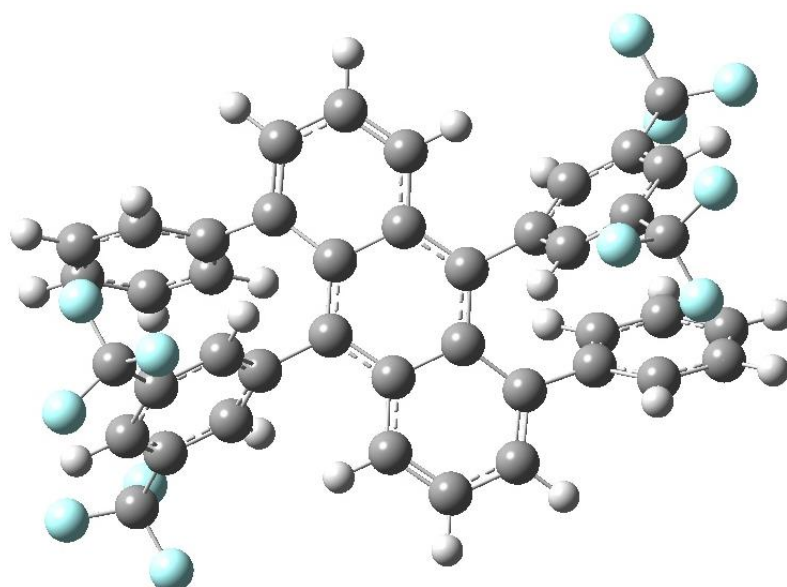

Fig. S4. Raman and ROA spectra

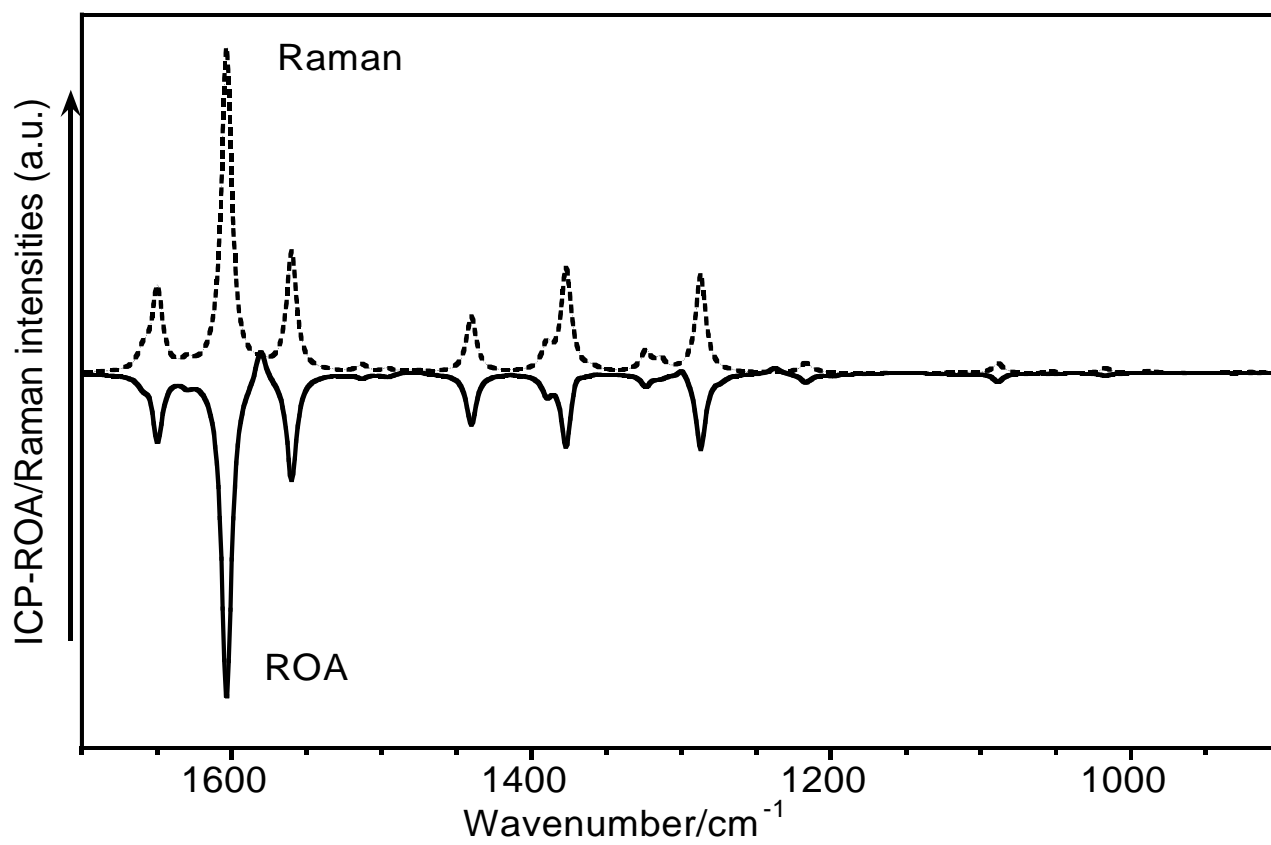

**Table S3.** Z-matrix of the optimized structure

|   |          |          |          |   |          |          |          |
|---|----------|----------|----------|---|----------|----------|----------|
| C | 1.17472  | -3.54424 | -0.25113 | H | 6.62361  | 0.96303  | 1.06731  |
| C | 1.71738  | -2.29603 | -0.46806 | C | 3.08168  | -2.24937 | -1.07381 |
| C | 0.89432  | -1.11831 | -0.24614 | C | 3.26356  | -1.67751 | -2.34374 |
| C | -0.53328 | -1.30691 | -0.07743 | C | 4.17643  | -2.87558 | -0.45943 |
| C | -1.0196  | -2.6335  | 0.15845  | C | 4.50465  | -1.72252 | -2.97618 |
| C | -0.18248 | -3.71376 | 0.11688  | C | 5.41946  | -2.919   | -1.09175 |
| C | 1.40922  | 0.19313  | -0.10102 | H | 4.05846  | -3.3067  | 0.53026  |
| C | -1.40915 | -0.19278 | -0.10112 | C | 5.58811  | -2.34411 | -2.35199 |
| C | -0.89426 | 1.11871  | -0.24574 | H | 4.62487  | -1.27626 | -3.95897 |
| C | 0.53336  | 1.30724  | -0.07696 | H | 6.25765  | -3.39818 | -0.59428 |
| C | 1.01973  | 2.63373  | 0.15926  | H | 6.5557   | -2.37844 | -2.84366 |
| H | 2.07018  | 2.77824  | 0.37534  | C | -3.08165 | 2.25014  | -1.07289 |
| C | 0.18266  | 3.71405  | 0.11797  | C | -3.26365 | 1.67886  | -2.34307 |
| C | -1.17456 | 3.54465  | -0.25002 | C | -4.17632 | 2.87608  | -0.45812 |
| C | -1.71727 | 2.2965   | -0.46725 | C | -4.5048  | 1.72418  | -2.97536 |
| H | 1.79252  | -4.41973 | -0.4258  | C | -5.41942 | 2.9198   | -1.09029 |
| H | -2.07003 | -2.77812 | 0.37453  | H | -4.05824 | 3.30682  | 0.53172  |
| H | -0.56787 | -4.71108 | 0.30524  | C | -5.58821 | 2.34549  | -2.35076 |
| H | 0.56809  | 4.71131  | 0.3065   | H | -4.62515 | 1.27839  | -3.95835 |
| H | -1.79237 | 4.42019  | -0.42439 | H | -6.25755 | 3.39875  | -0.59249 |
| C | -2.86018 | -0.4132  | 0.1906   | H | -6.55584 | 2.38005  | -2.84233 |
| C | -3.39365 | 0.06243  | 1.3948   | C | -5.91531 | -2.07844 | -1.32608 |
| C | -3.70447 | -1.10994 | -0.68181 | C | -5.29506 | 0.48506  | 2.96069  |
| C | -4.73955 | -0.13222 | 1.7055   | C | 5.91562  | 2.07842  | -1.32521 |
| H | -2.7533  | 0.59521  | 2.08937  | C | 5.29467  | -0.48642 | 2.96085  |
| C | -5.04914 | -1.30728 | -0.36561 | F | 5.69531  | 1.69807  | -2.60402 |
| H | -3.31584 | -1.47825 | -1.62474 | F | 5.66002  | 3.40656  | -1.26518 |
| C | -5.57769 | -0.81816 | 0.8281   | F | 7.23033  | 1.91329  | -1.07114 |
| H | -6.62352 | -0.96383 | 1.0665   | F | 6.45953  | 0.08161  | 3.33674  |
| C | 2.86024  | 0.41332  | 0.19086  | F | 5.53382  | -1.80991 | 2.79005  |
| C | 3.39355  | -0.06289 | 1.39492  | F | 4.43271  | -0.37794 | 3.99555  |
| C | 3.70471  | 1.11033  | -0.68114 | F | -7.2301  | -1.90965 | -1.0748  |
| C | 4.73946  | 0.13141  | 1.7058   | F | -5.66306 | -3.40707 | -1.26262 |
| H | 2.75306  | -0.59583 | 2.08923  | F | -5.69173 | -1.70143 | -2.60529 |
| C | 5.0494   | 1.30732  | -0.36475 | F | -5.53528 | 1.80837  | 2.79005  |
| H | 3.31618  | 1.47918  | -1.62391 | F | -6.45941 | -0.08393 | 3.33669  |
| C | 5.57779  | 0.81758  | 0.82875  | F | -4.43285 | 0.37715  | 3.99526  |
|   |          |          |          | H | 2.41968  | -1.20621 | -2.83936 |
|   |          |          |          | H | -2.41983 | 1.20777  | -2.83898 |

## 5. Raman spectra at different excitation laser

**Figure S5.** Raman spectra of **Ant-C3** at different laser excitations.

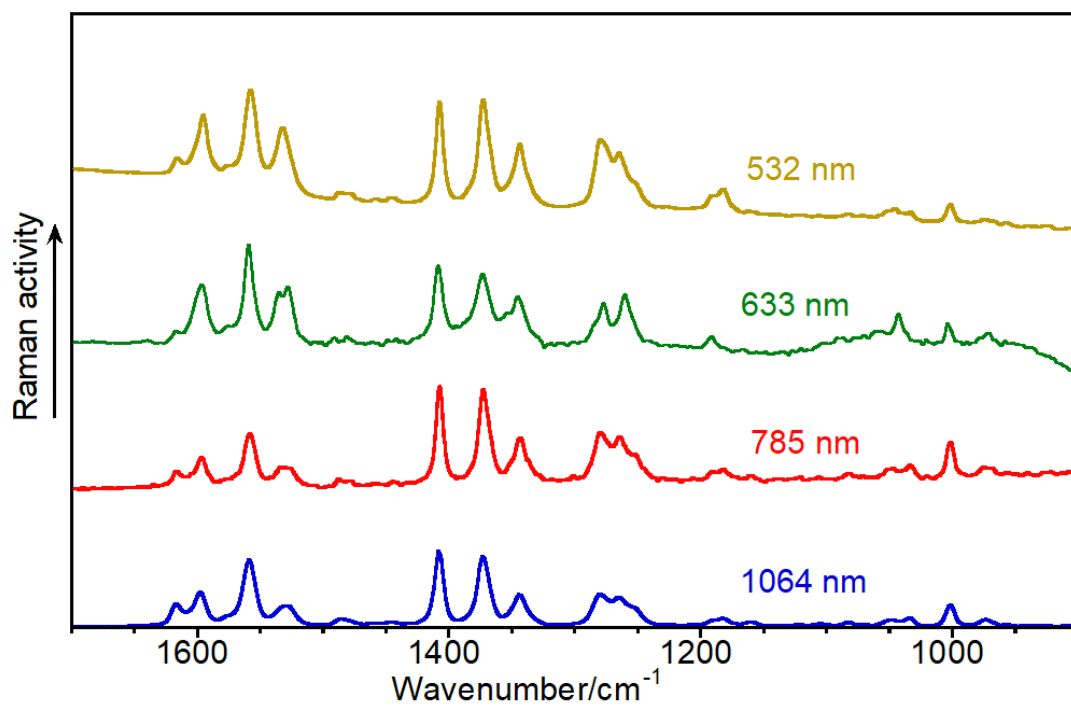

**Figure S6.** Raman spectra of **Ant-C4** at different laser excitations.

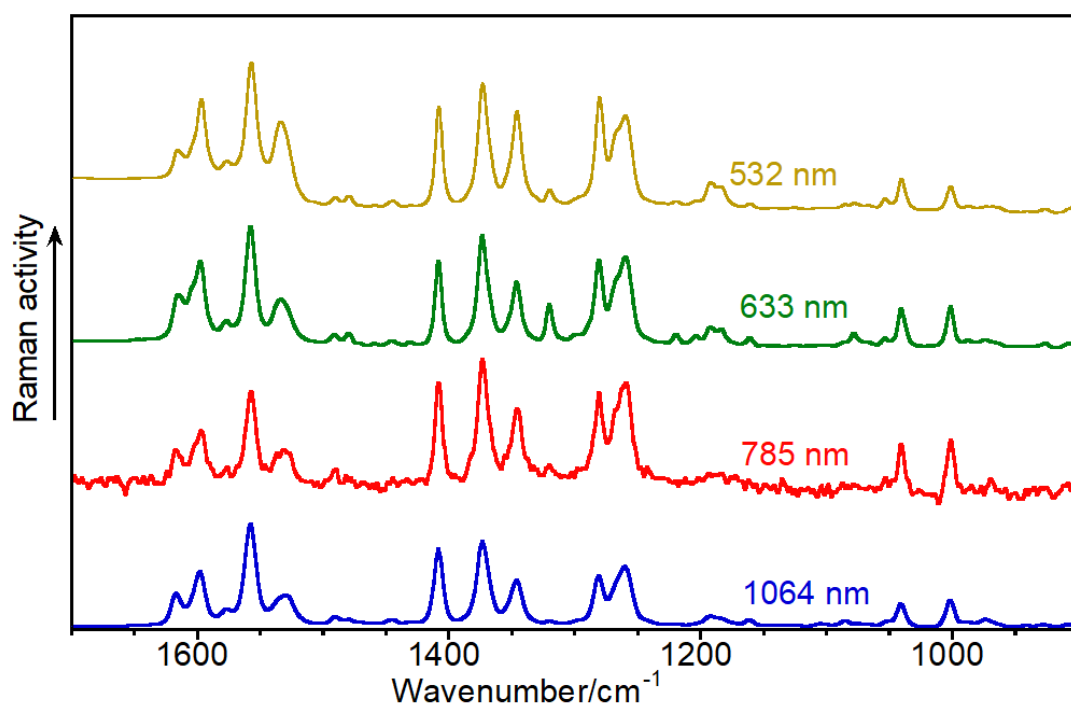

**Figure S7.** Raman spectra of **Ant-C5** at different laser excitations.

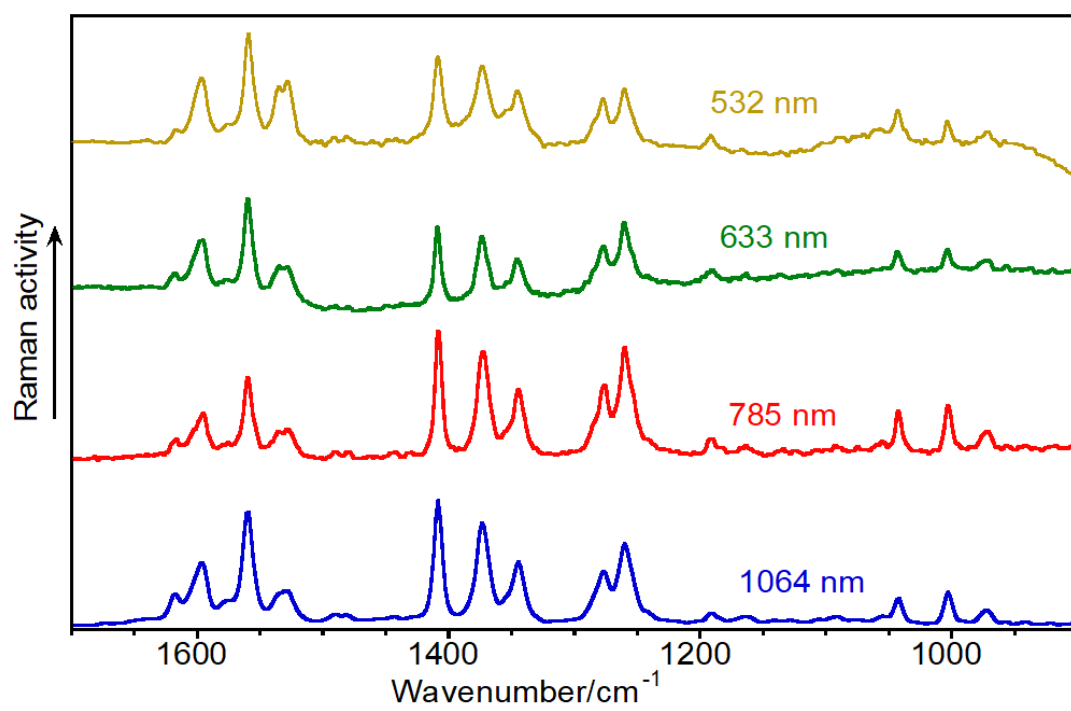

**Figure S8.** Raman spectra of **Ant-C6** at different laser excitations.

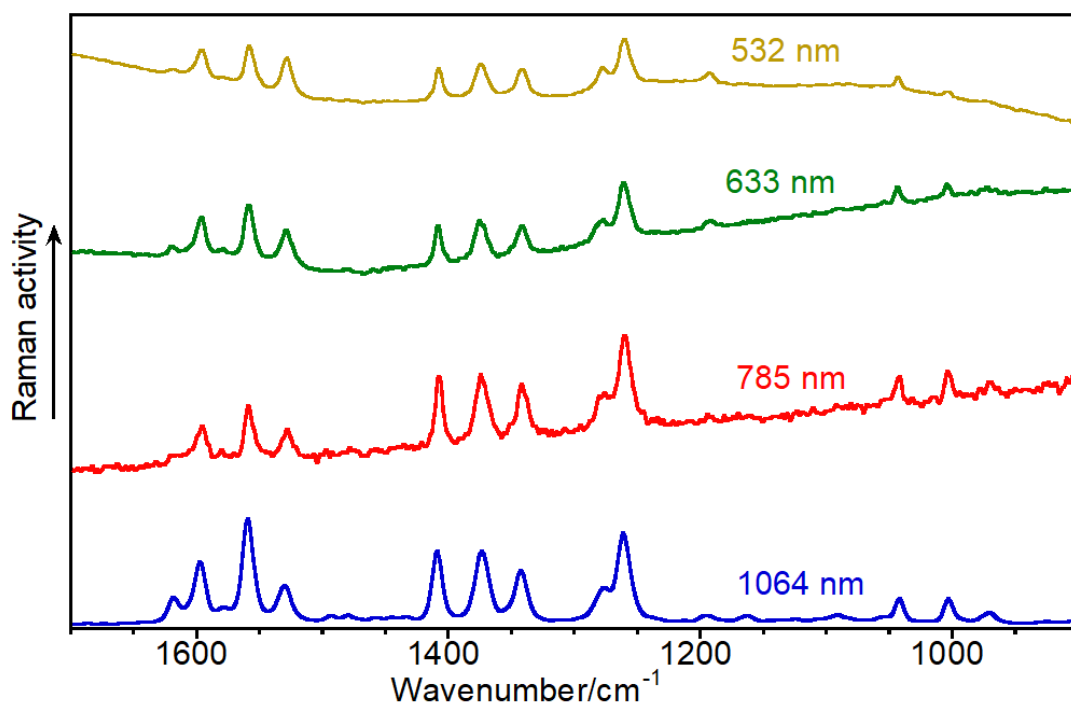

Supplement: d1cp01505b1.pdf [file d1cp01505b1.pdf]
